# Supplementary material
Source: PubMed Central journal article supplement (PMC3182833)
Supplement: NIHMS325042-supplement-Supp_Fig_S1-S5___Table_S1.pdf [file NIHMS325042-supplement-Supp_Fig_S1-S5___Table_S1.pdf]

## SUPPLEMENTAL INFORMATION

# ArsAB, a Novel Enzyme from *Sporomusa ovata* Activates Phenolic Bases for Adenosylcobamide Biosynthesis

Chi Ho Chan, and Jorge C. Escalante-Semerena\*

Department of Bacteriology, University of Wisconsin  
1550 Linden Drive, Madison, WI 53706-1521 USA

Running title: the  $\alpha$ -ribotide synthesis (*arsAB*) genes of *S. ovata*

\*For correspondence: E-mail: [escalante@bact.wisc.edu](mailto:escalante@bact.wisc.edu), Tel: (+1) 608 262 7379; Fax (+1) 608 265 7909

Figure S1. Scheme for the identification of *S. ovata* *arsA* and *arsB* genes.

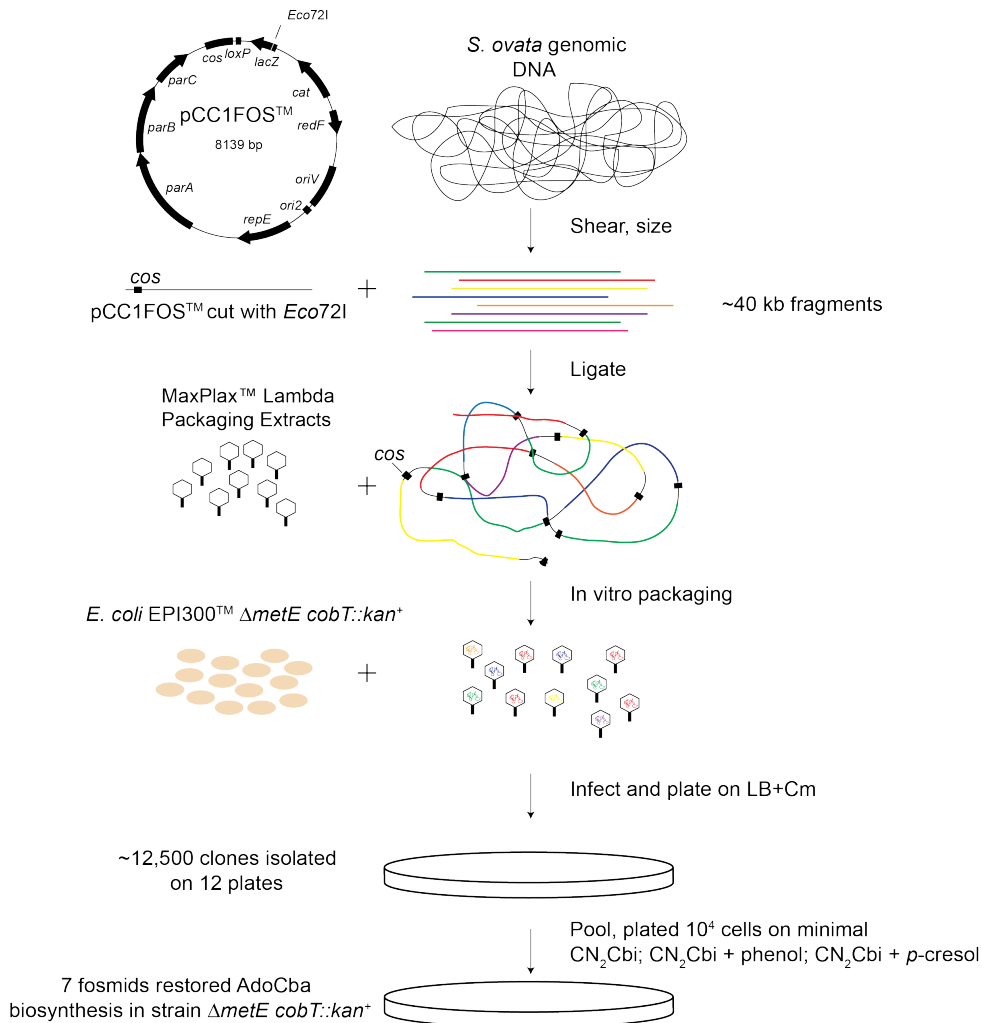

**Figure S2. Nucleotide sequence of the *arsA* and *arsB* genes of *S. ovata*.** Start codons (ATG) are highlighted in green, stop (TAG, TGA) codons are highlighted in red. *arsA* and *arsB* are 2,098 bp long (including stop codons); the entire sequence (as shown) = 2,267 bp

```

CAAGGGGAAGGCGTAAGAGTTAATGAACTGGGAGCCAGGAGACCTGCCTTATACCGCAACCATCCT
TCATGGACAAGAAGGCTTTTTTGGGCTTAACCAAAAAGCCTTTTATTTTTATCCAGATGGAAAGT
GGATAAAAACAAAAGACTTCTTTTAAGTATACTAGTAATGGAGGTTATTATGAGTTTACTGCAAGC
AACAGTAGCGAAAATTATGAGGCCGGATACAGTAATTAAGATCAGGTAAAGACTAAACTGGCAGG
TGTGTTACAGTCAGCAGGCAGCCTGGGGCGATTGGAAGATATGGTTGAGCAGTATGCGGGAATAAC
AGGCGAACTGAATCCGGCATTGCCTAAGCCTTGTATGGTGGTAGCTTCAGCTGACCATGGGGTGGC
CAGACGAGTGGTGAGTGCCTATCCGATAGAAACAACAATTCATATGACAGCTAATTATCTTATCTC
CCAAGGTGCAAGTGCCAATGCCTTTGCGAACTTCTGCGGGGCTGATATGGTTGTGGTTGATATGGG
CGTGGCTGGCGATTTGTCTTATGTTCCGGGACTGTGGCATCGCAAGATTGCCTATGGCACACAGGA
TTTTACCGAAGGCCCGGCAATGACGCGTGAGCAGGCCATCCAAGCGGTGGAAACAGGCATTGATAT
TGTTAATGACCGGGTGAAGCACGGCAATCGCTGTTTTTGTCTGGGAGAAATGGGCATTGGTAATAC
CACGTCCAGCGCAACCATTTGTTGGGGCATTACCGGTCTCGCTCCGGAGAAAGTTACCGGGCGGGG
CACCGGGATATCAGACAGCCGTCTTAAAACCAAGATGGAGATTGTCCGTCGGGCCTTAGCTGTGAA
TAAACCGAATCCTCAGGATGGATTAGATGTTCTGGCCAAAGTGGGTGGATTTGAACTAGGTGCATT
AGCCGGCGTAATTCCTGGCTCAGCCGCCAACCCTGCGCTGTCTGTTATTGATGGGCTTAACACGAC
GGCGGGCGCTTTAATCGCCAATGTCATTCATCCTCTGAGCAAAGAGTATATGTTTGCCTCGCACCT
GTCCGGTGAACCAGCTCATAGTATTGCGTTGCGTCAGCTTCAGTTAGAAGCTTGTCTGGAGCTGGG
AGTCCGGCTGGGAGAGGGTATCGGGGCTTCTATGGTTGTCGATATGCTCTATGTGGCCATTAAGCT
GCTAAATAATAGGGGAGGTAAAGCCAATGCTTGAAGAACTAATTGCAGCCATAAAACCACTTGATA
GTATAGCGATGGAACAGTGTGAGCGGCGAGTCGATAATCTGACCAAACCGTTAAACAGTCTGCATT
CCTTTGAACACATTGCCTGTAAGCTGGCAGGAATTAGCGGCAATCCCCGGCCACGGGCGCTGGAAA
AAAGCATCATTATTATGGCCGCTGATAATGGCGTAGCAATGGCAACTGACCAACAGCAGATGACAA
CAGCAGCCCAGCTGACCGGCTTCTGCCAGGGGAGGCGCCCATCCAGGTGTTTGCCGCCCATGTTT
AGGCCAGGCTGATTATGGTGGATATTGGTGTGCTGCCGACCTGCCGCATTCTCCGGCAGTATGCC
GGAAAAGCTGGCTTATGGCAGTCGCAATAGTACCGAAGTCCGGCTATGACCCGCCAACAAGCGA
TACAAGCCATTGAAGTGGGAGTAAGAATAGCACAAAGCAGAGATTGCGCGCGGCTGCCAGGTGATCG
GCTTGGGCGAAATGGGGCTGGGCGGTTTGGCTGCCGCTATGGCAATTGTCGCCTGCTGCCATGGTC
AGCCACTACCCGGCTTAGCCGGACGGGAGGCAGAACTTGTCAATACAGCTATCGCAGTCAACCGCC
CGAATGCTGCTGATCCACTGGATATTCTGACTAAGGTAGGTGGTTTGGCTATCGCCGGGTTAGTTG
GCGTTATTCTGGGGGCTGCGGCCGGGCGGGCGGCCGTGGTGTAGACGGTTTAGCCACAAGTACGG
CCGCCCTGATTGCTATAAACCTGGTTCCAGACGTTAAGCCTTATTTGATAGGCTCCCACTTTGCTG
CCGAGCCAGCCATGAGACAGCCTTGGCATTGCTTGACGTACCGGCCTATCTCCAACCTAAAATGA
ACCTGGGAGAAGGGACAGGTGCAGCACTCGGGATGTCAGTAATTAACGCCACGCTGCATATGCTAA
ATGACATGAAAACCTTTGGTGAGGCCGAAGTCGCTGTGGCGCAGGATGGACCAGGTGCTCTGCGGC
AAAGCAAGGATGTTAGAGATTAGCAAGC

```

Primary sequences were obtained using ExPASy Translate tool available online at <http://ca.expasy.org/tools/dna.html>. The putative catalytic Glu residue is highlighted in blue. Each protein is 350 residues long.

**ArsA (calculated mass = 36.65 kDa):**

```
MEVIMSL LQATVAKIMRPDTVIKDQVKT KLAGV LQSAGSLGRLEDMV
EQYAGITGELNPALPKPCM VVASADHGVARRVVSAYPIETTIHMTAN
YLISQ GASANAFANFCGADMVVVDMGVAGDLSYVPGLWHRKIAYGT
QDFTEGPAMTREQAIQAVETGIDIVNDRVKHGNRCFCLGEMGIGNT
TSSATIVGAFTGLAPEKVTGRGTGISDSRLKTKMEIVGRALAVNKPN
PQDGLDVLAKVGGFELGALAGVILGSAANRCAVVIDGLNTTAAALIA
NVIHPLSKEYMFASHLSGEPAH SIALRQLQLEACLELGVRLG E GIGA
SMVVDMLYVAIKLLNNRGGKANA
```

**ArsB (calculated mass = 36.18 kDa):**

```
MLEELIAAIKPLDSIAMEQCQRRVDNLT KPLNSLHSFEHIACKLAGIS
GNPRPRALEKSIIIMAADNGVAMATDQQQMTTAAARLTGFCQGQAPI
QVFAAHVQARLIMVDIGVAADLPHSPAVCRK KLAYGSRNSTEGPAM
TRQQAIQAIEVGVRIAQAEIARGCQVIGL GEMGLGGLAAAMAIVACC
HGQPLPGLAGREAELVNTAIAVNRPNAADPLDILT KVGGLAIAAGLVG
VILGAAAGRAAVVLDGLATSTAALIAINLV PDVKPYLIGSHFAAEPAH
ETALALLDVPAYLQLKMNLG E GTGAALGMSVINATLHMLNDMKTFG
EAEVAVAQDGGALRQSKDVRD
```

**Figure S3. UV-visible spectrum of CNCbl (vitamin B<sub>12</sub>) provided for comparison with the spectra of phenolic Cbas shown in figure 4 in the text.**

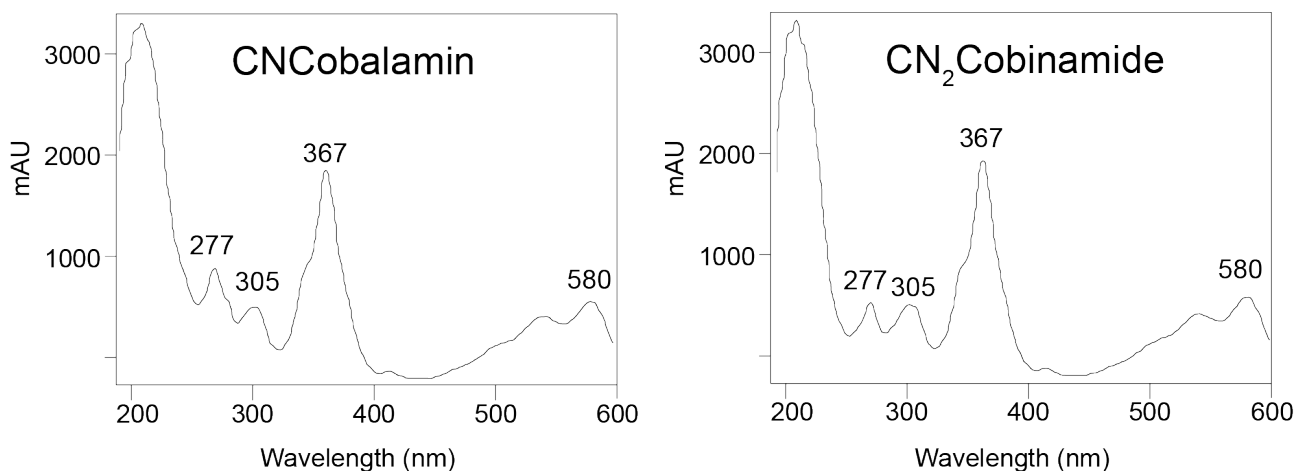

**Figure S4. Isolation and mass spectrometry of  $\alpha$ -ribosides.** RP-HPLC separation and ESI mass spectra of alkaline phosphatase-treated  $\alpha$ -ribosides synthesized by SoArsAB using phenol (panels A-C), *p*-cresol (panels D-F), and DMB (panels G-I). All samples were diluted 100x in 50% acetonitrile:50% water. Ammonium chloride (20 mM) was added to the samples containing  $\alpha$ -phenolyl- and  $\alpha$ -*p*-cresolyl-ribose before analysis.  $\alpha$ -Phenolyl- and  $\alpha$ -*p*-cresolyl-ribosides did not ionize without added chloride.

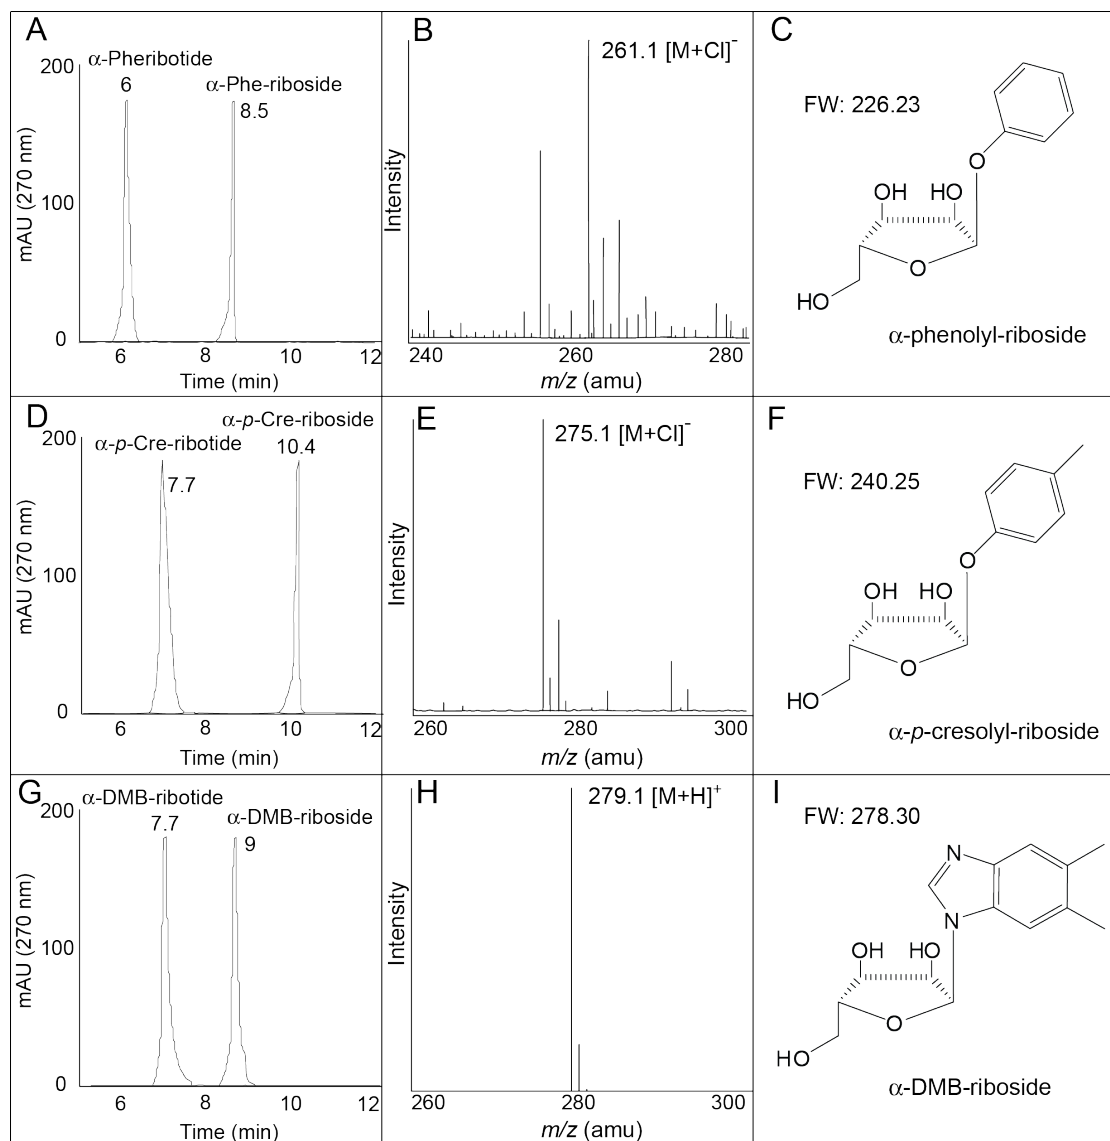

**Figure S5. Alignment of ArsA and ArsB proteins of *S. ovata* with the putative proteins of *Dialister invisus* and *Veillonella parvula*.** Conserved regions are highlighted. SoArsA is 52% identical, 70 % similar to *Di*ArsA; *Di*ArsA is 49% identical, 64% to *Vp*ArsA, and *Vp*ArsA is 49% identical, 64% similar to SoArsA. SoArsB is 33% identical, 53 % similar to *Di*ArsB; *Di*ArsB is 38% identical, 57% to *Vp*ArsB, and *Vp*ArsB is 35% identical, 52% similar to SoArsB.

### ArsA

|                   |                                                          |     |
|-------------------|----------------------------------------------------------|-----|
| <i>S. ovata</i>   | MEVIMSLLOATVAKTMRPDTVIKDQVTKLAGVLQSAGSLGRLEDMVEQYAGITG   | 55  |
| <i>D. invisus</i> | ----MGLLDETIGRTHPLDREAMYKAQKRWDDLYVGVGDLGKLEEMVIOYAGVTG  | 51  |
| <i>V. parvula</i> | ----MSLLOETCGATTGRSLKIEQHFNSWN-AESPVELYGRIVDVAQYGAATN    | 50  |
| <i>S. ovata</i>   | ELNPALPKPCMVASADHGVARRVVSAYPIETTTHMTANYLISQGASANAFANFC   | 110 |
| <i>D. invisus</i> | EVLPEIPKCCMVVACADHGVYRQKVSAYPOSTTVGMVKSVDVKGASANALAHYC   | 106 |
| <i>V. parvula</i> | QEQVTVPKPCMIIASADHGVADMVGSAYPKETTVMGTONYLIIPKGAANSANLNYC | 105 |
| <i>S. ovata</i>   | GADMVVVDMGVAGDLSYVPLGHRKTIAYGTQDFTEGPAMTREQATQAVETGIDIV  | 165 |
| <i>D. invisus</i> | GAHMVVVDMGINADMSDVPGLLHRKITFGTKDITEGAAMSRAEATHAIEAGIETA  | 161 |
| <i>V. parvula</i> | GAQMEVVIDMGIDADMSWVPLRSHKLGMGTKNFVEEPAMTREQAVEGIETGIRIV  | 160 |
| <i>S. ovata</i>   | NDRVKHGNRCFCLGEMGIGNTTSATIIVGAFITGLAPEKVTGRGTGISDSRLKTKM | 220 |
| <i>D. invisus</i> | ENKIKEGYRVFTVVGEMGIANTTASACILGAFNRWNAVEVTGRGTNISDARLLHKI | 216 |
| <i>V. parvula</i> | KEKIDEGFNVLVVGEMGISNTTASALMTAKFAGITAEETGRGTNISDERLKLKQ   | 215 |
| <i>S. ovata</i>   | EIVGRALAVNKPNDPQDGLDVLAKVGGFELGALAGVILGSAANRCAVVIDGLNNT  | 274 |
| <i>D. invisus</i> | EMVOKALDVNQPDPADGLDVLKSVGGFEFGCMTGVMLGAAANHCMTIIDGFNST   | 270 |
| <i>V. parvula</i> | RIVHDVLEKYKDISKDDALGILSSVGGFEFACIVGVILGAAANHGLVIIDGFNTS  | 270 |
| <i>S. ovata</i>   | AAALIANVIHPLSKBYMFASHLSGEPHSHIALROLEACLELGVRLGEGIGASM    | 329 |
| <i>D. invisus</i> | ASAFIAKALSEESVOYLMASHLSLEPOAHRKSLKATGLTEYIDLDIRLGEAVGAST | 325 |
| <i>V. parvula</i> | ACALVAKTLAPKAMDYVMASHLSAEKAAKSSLENLGLEAYVDLGLCLGEASGGSIT | 325 |
| <i>S. ovata</i>   | VVDMLYVAIKLLNRRGKANA                                     | 350 |
| <i>D. invisus</i> | OKKILDMALAVYKDGADKRTGVAE                                 | 349 |
| <i>V. parvula</i> | QMGMLDLAVHMYMAITGGNK                                     | 345 |

### ArsB

|                   |                                                          |     |
|-------------------|----------------------------------------------------------|-----|
| <i>S. ovata</i>   | MLEELIAAIKPLDSIAMEQCQRVDNLTKPLNSLHSFEHIACKLAGISGNPRPRA   | 55  |
| <i>D. invisus</i> | -----MSGIQAPDKETMEACRLYVDNLTKPIHSLGKLEDIAVRLAGITGKIKPGK  | 50  |
| <i>V. parvula</i> | ---MRTFKVEPLDTQAMETCRFRIDNLTKPIYSLATLETIAERFAGILGDPKPNH  | 52  |
| <i>S. ovata</i>   | L K I IMAADNGVAM-ATDOOQMTAARLTGFCCQOAPIQVFAAHVQARLIMVD   | 109 |
| <i>D. invisus</i> | LNKALVIMAGDTAVDG-ENKTGKTSLSLEVQMVSRGLGTVSAVARTLIGAPVYLID | 104 |
| <i>V. parvula</i> | LRQGLVVAADHLVDGPONDQHGSESYAAIKRFNEGRTATQGAAKLNAVAHVVN    | 107 |
| <i>S. ovata</i>   | IGVAADLPHSPAVERCKKLAYGSRNSTEGPAMTRQQAIAIEVGVRIAQAEIARGC  | 164 |
| <i>D. invisus</i> | VGLEQNTNDIEGVLTKNVVYGTNRG--NPALDQDAVSAAISIGMSVARTLAVQGI  | 157 |
| <i>V. parvula</i> | VGLEQDTSDLTNIQQVIRKGSHPFGVEPAISRDELERALELGFYADKLHADGL    | 162 |
| <i>S. ovata</i>   | QVIGLGEMGLGGLAAAIAIVACCHG-----QPLPGLAGREAEV              | 203 |
| <i>D. invisus</i> | QAVGLGNIGERSLISALGVTAAIM-----KKELOENSLKDGFI              | 194 |
| <i>V. parvula</i> | QVVATCNVGERAFIDSLVTTATITFCAYEDILVHNEYGPTIEQRAAHIHSFVDRF  | 217 |
| <i>S. ovata</i>   | NTAIAVNRPNAAADP-----LDILTQVGGGLAAGLVGVILGAAAGRAAVLDGLAT  | 253 |
| <i>D. invisus</i> | SLHMDVGNMANDP-----VGVLSRVGSAEITAGLFGLVVQAAREKIAIVFDNAVIT | 244 |
| <i>V. parvula</i> | NTAVDDWSTISESERRDAVLLHLHIAGGLDIAFTAFILGAASHRMVAVFDNIVT   | 272 |
| <i>S. ovata</i>   | STAALIAINLVDPVKPYLIGSHFAA----EPAHETALALLDVPAYLQKMNLFGE   | 303 |
| <i>D. invisus</i> | GAAVLAAIEVYPEVRDYVFPSSAAYN----EPVHQIQMKKLGMKPFYDYDFVAE   | 294 |
| <i>V. parvula</i> | GAAVLAAVTIEPLVKDYVFPSSAAYDEPIHDEPIHKEQCRFLGVKPYLDYKLLIDE | 327 |
| <i>S. ovata</i>   | GTGAALGMSVINATLHMLNDMKTFGAEVAVAOQDGPALROSKDVRD           | 350 |
| <i>D. invisus</i> | GFGSAMLSLFDAALDMVNEMKTFGQGGVDVAEDGPGKGRORVDVQ            | 340 |
| <i>V. parvula</i> | ALGSTMGLSIIIDASMHMLNDMKTVEAEVSVVAEDGACKGRQKNKE           | 372 |

**Table S1. Peptide fingerprint of purified ArsAB**

Purified ArsAB was digested with trypsin, and the peptide mixture was analyzed by MS/MS. Masses detected were matched to the predicted peptides generated by trypsin digest.

| ArsA          |                                                           |
|---------------|-----------------------------------------------------------|
| Observed mass | Peptide                                                   |
| 1757.7549     | IAYGTQDFTEGPAMTR                                          |
| 1870.8734     | EQAIQAVETGIDIVNDR                                         |
| 1871.9658     | VGGFELGALAGVILGSAANR                                      |
| 1885.8506     | KIAYGTQDFTEGPAMTR                                         |
| 2115.9612     | EYMFASHLSGEPAHSIAR                                        |
| 2989.3035     | CFCLGEMGIGNTTSSATIVGAFTGLAPEK + 2 Carbamidomethyl (C)     |
| 3402.4731     | CFCLGEMGIGNTTSSATIVGAFTGLAPEKVTGR + 2 Carbamidomethyl (C) |
| 3738.6433     | LEDMVEQYAGITGELNPALPKPCMVASADHGVAR + Carbamidomethyl (C)  |

| ArsB          |                                                             |
|---------------|-------------------------------------------------------------|
| Observed mass | Peptide                                                     |
| 732.5325      | QSKDVR                                                      |
| 1311.6975     | QQAIQAIEVGVR                                                |
| 1734.9993     | VGGLAIAGLVGVILGAAAGR                                        |
| 1787.8163     | TFGEAEVAVAQDGPGALR                                          |
| 2134.0281     | LIMVDIGVAADLPHSPAVCR + Carbamidomethyl (C)                  |
| 2299.0833     | LTGFCQGQAPIQVFAAHVQAR + Carbamidomethyl (C)                 |
| 2479.1797     | RVDNLTKPLNSLHSFEHIACK + Carbamidomethyl (C)                 |
| 2575.1985     | MLEELIAAIKPLDSIAMEQCQR + Carbamidomethyl (C); Oxidation (M) |
| 2608.1443     | SIIIMAADNGVAMATDQQQMTTAAR                                   |
| 2648.3157     | EAELVNTAIAVNRPNADPLDILTK                                    |
| 2789.2412     | MNLGEGTGAALGMSVINATLHMLNDMK                                 |
| 3562.5693     | GCQVIGLGEMGLGGLAAAMAIVACCHGQPLPGLAGR+ 3 Carbamidomethyl (C) |

**Table S2.** Phosphoribosyltransferase activity of SoArsAB in varying buffer and pH.

| Substrate                 | Buffer                  | Specific activity <sup>a</sup> |
|---------------------------|-------------------------|--------------------------------|
| Phenol                    | pH 7 MOPS <sup>b</sup>  | 16 ± 1                         |
| Phenol                    | pH 8 HEPES <sup>c</sup> | 23 ± 3                         |
| Phenol                    | pH 9 Glycine            | 26 ± 3                         |
| Phenol                    | pH 10 Glycine           | 18 ± 1                         |
| 5,6-Dimethylbenzimidazole | pH 9 Glycine            | 19 ± 3                         |

<sup>a</sup> nmol  $\alpha$ -ribotide / min per mg of protein; average of triplicate activity measurements; the experiment was performed twice.

<sup>b</sup> MOPS, 3-(*N*-morpholino)propanesulfonic acid

<sup>c</sup> HEPES, 2-[4-(2-hydroxyethyl)piperazin-1-yl]ethanesulfonic acid

## References

- Möller, B., R. Ossmer, B. H. Howard, G. Gottschalk & H. Hippe, (1984) *Sporomusa*, a new genus of Gram-negative anaerobic-bacteria including *Sporomusa-Sphaeroides* spec-nov and *Sporomusa-Ovata* spec-nov. *Arch. Microbiol.* **139**: 388-396.
- Pospiech, A. & B. Neumann, (1995) A versatile quick-prep of genomic DNA from gram-positive bacteria. *Trends Genet.* **11**: 217-218.
